# Supplementary material for: Tropical Andosol organic carbon quality and degradability in relation to soil geochemistry as affected by land use
Source: Copernicus journal article supplement (doi:10.5194/soil-9-443-2023), 2023-07-31
Supplement: Supplementary file 1 [file soil-9-443-2023-supplement.pdf]

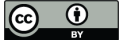

*Supplement of*

## **Tropical Andosol organic carbon quality and degradability in relation to soil geochemistry as affected by land use**

**Sastrika Anindita et al.**

*Correspondence to:* Sastrika Anindita ([sastrika.anindita@gmail.com](mailto:sastrika.anindita@gmail.com))

The copyright of individual parts of the supplement might differ from the article licence.

## Supplement 1

Table S1. Weathering indices, some of estimated minerals, volcanic glass, and code of soil classification in the study sites. Data taken from Anindita et al. (2022)

| Sites/<br>Depth          | Weathering indices                                                                                          |          |                        | Minerals |                  |               |                     |          | Volcanic<br>glass | Code of Soil<br>classification <sup>1</sup> |
|--------------------------|-------------------------------------------------------------------------------------------------------------|----------|------------------------|----------|------------------|---------------|---------------------|----------|-------------------|---------------------------------------------|
|                          | SiO <sub>2</sub> / (Al <sub>2</sub> O <sub>3</sub> +<br>Fe <sub>2</sub> O <sub>3</sub> + TiO <sub>2</sub> ) | CIA<br>% | Amorphous<br>materials | Quartz   | Cristo<br>balite | Tridy<br>mite | 1:1 clay<br>mineral | Gibbsite | %                 |                                             |
| Primary forest (NF-y)    |                                                                                                             |          |                        |          |                  |               |                     |          |                   |                                             |
| 0-20                     | 8.6                                                                                                         | 66       | 27.7                   | 15.5     | 6.4              | 22.0          | 8.1                 | 0.6      | 4.5               | dy,se,vi,an CM<br>(au,lo)                   |
| 20-40                    | 8.9                                                                                                         | 71       | 23.2                   | 18.3     | 8.3              | 27.7          | 6.4                 | 0.3      | 2.3               |                                             |
| subsoil                  | 4.7                                                                                                         | 68       | 29.1                   | 14.9     | 7.0              | 22.0          | 9.2                 | 0.3      | 5.4               |                                             |
| Pine forest (PF-i)       |                                                                                                             |          |                        |          |                  |               |                     |          |                   |                                             |
| 0-20                     | 1.9                                                                                                         | 93       | 47.1                   | 2.9      | 2.9              | 10.1          | 26.2                | 4.5      | 1.9               | dy,se,an CM<br>(au,ce)                      |
| 20-40                    | 1.5                                                                                                         | 97       | 42.9                   | 1.9      | 3.1              | 8.6           | 26.5                | 3.6      | 1.9               |                                             |
| subsoil                  | 1.3                                                                                                         | 99       | 48.1                   | 0.5      | 2.6              | 4.4           | 29.9                | 8.5      | 0.9               |                                             |
| Pine forest (PF-o)       |                                                                                                             |          |                        |          |                  |               |                     |          |                   |                                             |
| 0-20                     | 0.8                                                                                                         | 98       | 49.7                   | 2.1      | 5.4              | 3.5           | 18.0                | 14.9     | 0.9               | dy,aa AN (ce,se)                            |
| 20-40                    | 0.9                                                                                                         | 98       | 50.6                   | 1.4      | 3.9              | 3.1           | 19.0                | 15.6     | 1.6               |                                             |
| subsoil                  | 1.1                                                                                                         | 99       | 47.0                   | 2.3      | 4.3              | 4.9           | 25.7                | 9.1      | 0.9               |                                             |
| Agricultural land (AG-y) |                                                                                                             |          |                        |          |                  |               |                     |          |                   |                                             |
| 0-20                     | 1.5                                                                                                         | 96       | 54.8                   | 0.7      | 2.7              | 7.2           | 30.3                | 2.4      | 1.3               | eu,aa AN<br>(ce,ai,se)                      |
| 20-40                    | 1.5                                                                                                         | 97       | 52.3                   | 1.4      | 2.8              | 7.6           | 31.5                | 2.3      | 1.8               |                                             |
| subsoil                  | 1.7                                                                                                         | 96       | 54.7                   | 3.2      | 2.7              | 8.0           | 23.7                | 3.0      | 1.7               |                                             |
| Agricultural land (AG-i) |                                                                                                             |          |                        |          |                  |               |                     |          |                   |                                             |
| 0-20                     | 1.4                                                                                                         | 88       | 62.3                   | 3.3      | 1.6              | 3.6           | 7.9                 | 7.8      | 1.1               | eu,aa AN<br>(ce,ai,se)                      |
| 20-40                    | 1.0                                                                                                         | 95       | 64.5                   | 2.1      | 2.0              | 2.7           | 11.8                | 10.4     | 1.6               |                                             |
| subsoil                  | 1.1                                                                                                         | 94       | 65.0                   | 1.9      | 2.4              | 2.3           | 11.0                | 8.8      | 0.1               |                                             |
| Agricultural land (AG-o) |                                                                                                             |          |                        |          |                  |               |                     |          |                   |                                             |
| 0-20                     | 1.9                                                                                                         | 88       | 53.1                   | 2.2      | 4.4              | 5.7           | 23.4                | 2.1      | 2.0               | eu,aa AN<br>(ce,ai,se)                      |
| 20-40                    | 1.7                                                                                                         | 92       | 50.2                   | 1.8      | 5.5              | 5.5           | 26.8                | 2.4      | 1.9               |                                             |
| subsoil                  | 1.6                                                                                                         | 96       | 46                     | 0.8      | 5.0              | 5.3           | 34.2                | 1.8      | 1.3               |                                             |

<sup>1</sup>Soil classification is based on World Reference Base (IUSS, 2015)

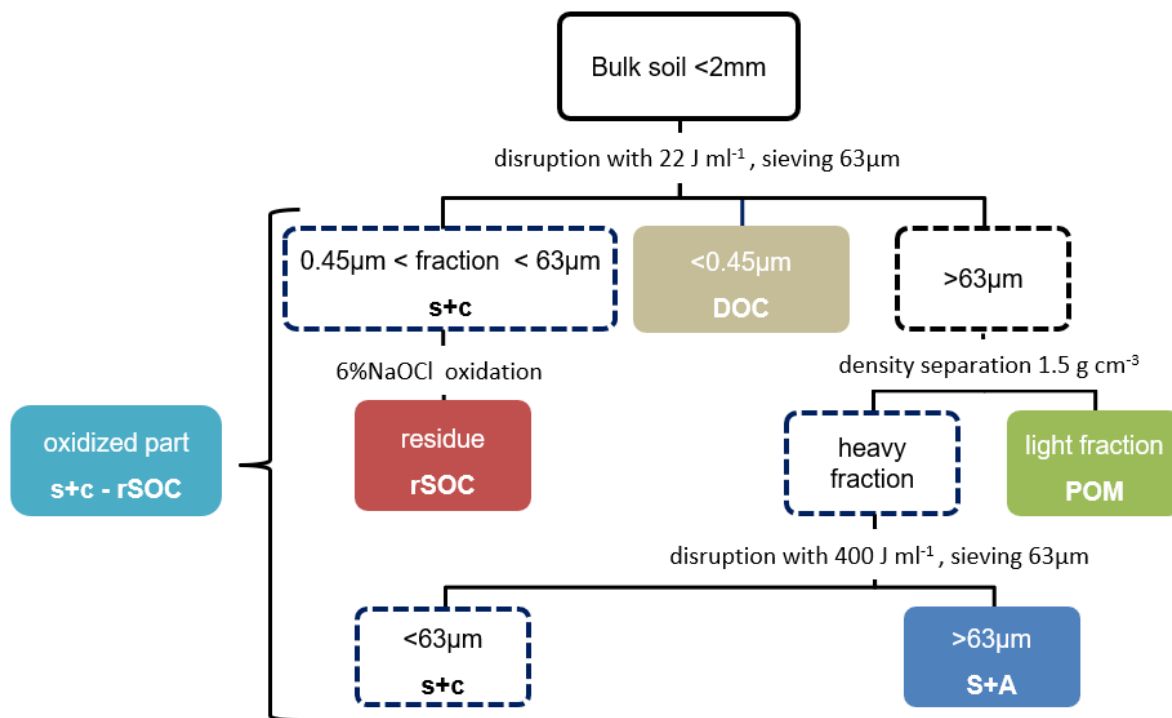

Fig. S1 Schematic of the used soil fractionation procedure, based on the procedure by Zimmerman et al. (2007) but adapted to use with volcanic soils: 1) Free particulate organic matter (POM) in the > 63µm fraction is separated by density at 1.5 g cm<sup>-3</sup> instead of 1.8 g cm<sup>-3</sup>; 2) a second stronger ultrasonic dispersion step was introduced to separate the considerable > 63µm heavy fraction into silt and clay (s+c) and sand and stable aggregates (S+A). The amount of chemically oxidizable C contained in silt and clay is not measured but calculated from the difference in C contained in both isolated s+c fractions and the C in the 6%NaOCl oxidation residue.
